# Supplementary figures and images for: High-yield synthesis of hollow boron nitride nano-polyhedrons
Source: Royal Society of Chemistry journal article supplement (doi:10.1039/c1jm10774g), 2011-01-01

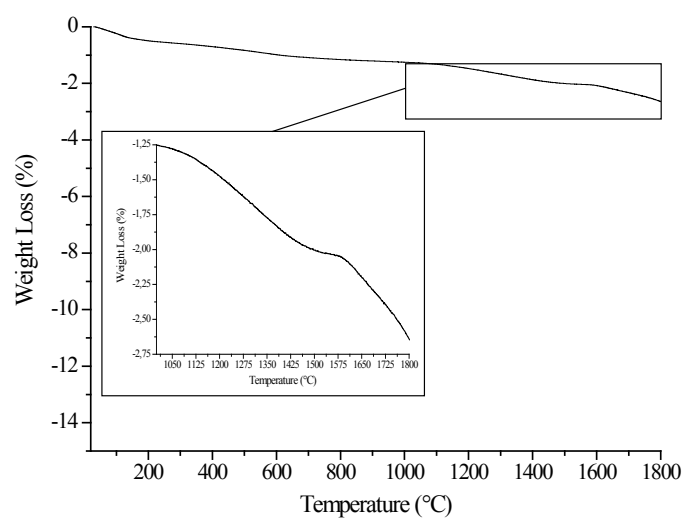

**Figure 1SI.** TGA curve recorded during annealing of sample **1** in nitrogen environment from RT to 1800 °C.

Supplement: c1jm10774g.pdf [file c1jm10774g.pdf]
